# Supplementary material
Source: PubMed Central journal article supplement (PMC5860424)
Supplement: kwx064hassanwebmaterialfinal.pdf [file kwx064hassanwebmaterialfinal.pdf]

## WEB MATERIAL

**Web Table 1. Subgenotype data by the place of birth.**

|                       |                    | <b>USAA<br/>N=57</b> | <b>East<br/>African<br/>FBAA<br/>N=112</b> | <b>West<br/>African<br/>FBAA<br/>N=54</b> | <b>Other<br/>FBAA<br/>N=14</b> |
|-----------------------|--------------------|----------------------|--------------------------------------------|-------------------------------------------|--------------------------------|
| <b>Genotype</b>       | <b>Subgenotype</b> | N=42                 | N=75                                       | N=43                                      | N=11                           |
| <b>A</b>              | A1                 | 2(5%)                | 55(73%)                                    | 4(9%)                                     | 8(73%)                         |
|                       | A2                 | 35(83%)              | 1(1%)                                      | 3(7%)                                     | 1(9%)                          |
|                       | A3                 | 0(0%)                | 0(0%)                                      | 2(5%)                                     | 0(0%)                          |
|                       | A5                 | 0(0%)                | 0(0%)                                      | 1(2%)                                     | 0(0%)                          |
| <b>B</b>              | B1                 | 1(2%)                | 0(0%)                                      | 0(0%)                                     | 0(0%)                          |
|                       | B2                 | 0(0%)                | 2(3%)                                      | 1(2%)                                     | 0(0%)                          |
|                       | B4                 | 0(0%)                | 0(0%)                                      | 1(2%)                                     | 1(9%)                          |
| <b>C</b>              | C1                 | 1(2%)                | 0(0%)                                      | 0(0%)                                     | 0(0%)                          |
|                       | C2                 | 1(2%)                | 1(1%)                                      | 0(0%)                                     | 0(0%)                          |
| <b>D</b>              | Dx                 | 0(0%)                | 4(5%)                                      | 2(5%)                                     | 0(0%)                          |
|                       | D1                 | 0(0%)                | 2(3%)                                      | 0(0%)                                     | 0(0%)                          |
|                       | D2                 | 0(0%)                | 1(1%)                                      | 0(0%)                                     | 0(0%)                          |
|                       | D3                 | 0(0%)                | 1(1%)                                      | 0(0%)                                     | 0(0%)                          |
|                       | D4                 | 0(0%)                | 2(3%)                                      | 0(0%)                                     | 0(0%)                          |
|                       | D6                 | 0(0%)                | 1(1%)                                      | 0(0%)                                     | 0(0%)                          |
|                       | D7                 | 0(0%)                | 3(4%)                                      | 0(0%)                                     | 0(0%)                          |
| <b>E</b>              |                    | 0(0%)                | 1(1%)                                      | 28(65%)                                   | 1(9%)                          |
| <b>F/G/H/Multiple</b> |                    | 2(5%)                | 1(1%)                                      | 1(2%)                                     | 0(0%)                          |

The subscript x denotes that subgenotype was not determined.

**Web Figure 1: Comparison of HBV DNA (IU/mL) levels across different genotypes (p=0.2), where colors represent HBV DNA categories and numbers represent the percentages of participants in different HBV DNA categories.**

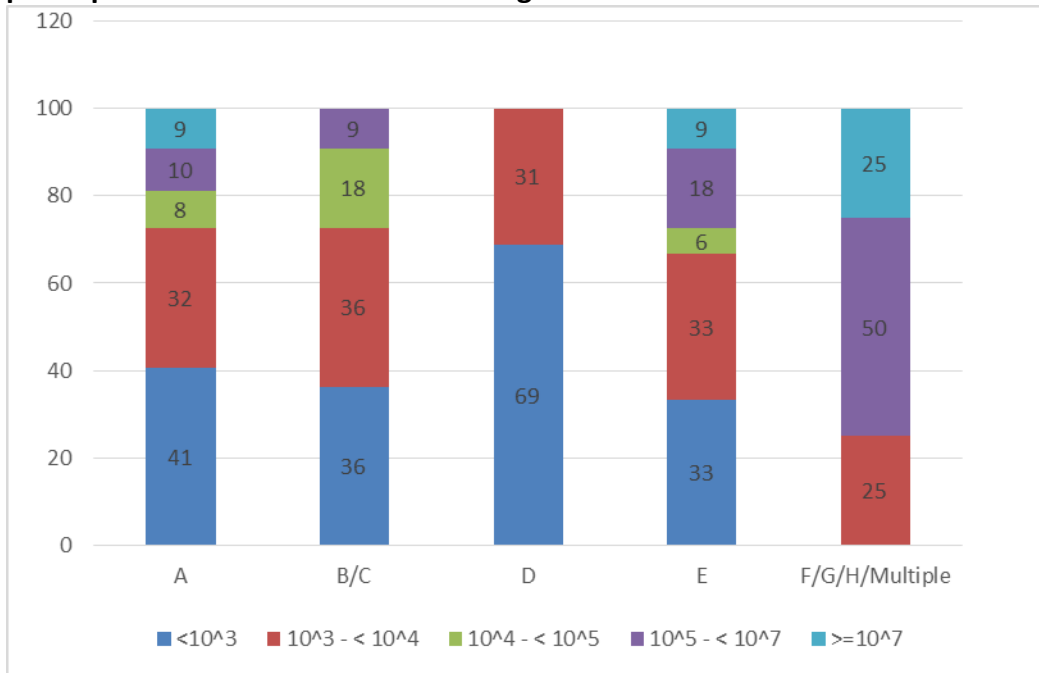

**Web Table 2. Univariate analysis comparing median ALT (in multiples of ULN) among participant groups stratified by various patient characteristics, where ULN equals 30 U/L for males and 20 U/L for females.**

| Variable                                      |                                     | N          | Median ALT (25 <sup>th</sup> - 75 <sup>th</sup> percentile) in ULN | p     |
|-----------------------------------------------|-------------------------------------|------------|--------------------------------------------------------------------|-------|
| <b>Overall</b>                                |                                     | 228        | 1.2 (0.8,1.7)                                                      | NA    |
| <b>Birthplace</b>                             | US                                  | 56         | 1.2 (0.9,2.3)                                                      | <.001 |
|                                               | E Africa                            | 104        | 1.0 (0.7,1.3)                                                      |       |
|                                               | W Africa                            | 54         | 1.5 (1.0,2.2)                                                      |       |
|                                               | Other                               | 14         | 1.2 (0.9,2.8)                                                      |       |
| <b>Sex</b>                                    | Male                                | 126        | 1.2 (0.9,2.1)                                                      | 0.02  |
|                                               | Female                              | 102        | 1.0 (0.8,1.4)                                                      |       |
| <b>Age group</b>                              | 18-<40 yrs                          | 92         | 1.2 (0.9,2.1)                                                      | 0.01  |
|                                               | 40-<60 yrs                          | 108        | 1.2 (0.9,1.6)                                                      |       |
|                                               | 60+ yrs                             | 28         | 0.9 (0.7,1.1)                                                      |       |
| <b>Genotype</b>                               | <u>A</u>                            | <u>117</u> | <u>1.2 (0.9,1.6)</u>                                               | 0.02  |
|                                               | <u>B/C</u>                          | <u>10</u>  | <u>1.2 (0.7,1.5)</u>                                               |       |
|                                               | <u>E</u>                            | <u>33</u>  | <u>1.7 (1.0,3.4)</u>                                               |       |
|                                               | <u>D</u>                            | <u>15</u>  | <u>1.0 (0.6,1.5)</u>                                               |       |
|                                               | <u>F/G/Multiple</u>                 | <u>4</u>   | <u>2.2(1.1,3.3)</u>                                                |       |
| <b>Mode of transmission</b>                   | Vertical                            | 38         | 1.2 (1.0,2.1)                                                      | 0.006 |
|                                               | Sexual                              | 24         | 1.4 (1.0,3.2)                                                      |       |
|                                               | Other horizontal                    | 111        | 1.1 (0.7,1.4)                                                      |       |
| <b>History of Injection drug use</b>          | No                                  | 223        | 1.1 (0.8,1.7)                                                      | 0.04  |
|                                               | Yes                                 | 4          | 2.5 (1.6,4.3)                                                      |       |
| <b>History of Intranasal illicit drug use</b> | No                                  | 217        | 1.1 (0.8,1.6)                                                      | 0.07  |
|                                               | Yes                                 | 9          | 1.9 (1.2,3.1)                                                      |       |
| <b>History of Blood transfusion</b>           | No                                  | 193        | 1.2 (0.9,1.7)                                                      | 0.03  |
|                                               | Yes                                 | 28         | 0.9 (0.8,1.2)                                                      |       |
| <b>Tattoo</b>                                 | No                                  | 200        | 1.1 (0.8,1.6)                                                      | 0.03  |
|                                               | Yes                                 | 24         | 1.5 (1.1,2.9)                                                      |       |
| <b>History of STD</b>                         | No                                  | 167        | 1.1 (0.8,1.7)                                                      | 0.5   |
|                                               | Yes                                 | 35         | 1.2 (0.9,1.9)                                                      |       |
| <b>Same sex intercourse</b>                   | No                                  | 204        | 1.2 (0.8,1.6)                                                      | 0.3   |
|                                               | Yes                                 | 7          | 1.9 (0.8,2.8)                                                      |       |
| <b>HBeAg</b>                                  | Negative/Equivocal                  | 197        | 1.1 (0.8,1.5)                                                      | <.001 |
|                                               | Positive                            | 27         | 2.8 (1.4,4.1)                                                      |       |
| <b>HBV DNA (IU/mL)</b>                        | <10 <sup>3</sup>                    | 114        | 1.0 (0.8,1.3)                                                      | <.001 |
|                                               | 10 <sup>3</sup> - < 10 <sup>4</sup> | 59         | 1.1 (0.8,1.4)                                                      |       |
|                                               | 10 <sup>4</sup> - < 10 <sup>5</sup> | 17         | 1.2 (1.0,1.7)                                                      |       |
|                                               | 10 <sup>5</sup> - < 10 <sup>7</sup> | 21         | 2.8 (1.6,5.6)                                                      |       |
|                                               | ≥ 10 <sup>7</sup>                   | 15         | 3.4 (2.8,4.9)                                                      |       |
